# Supplementary material
Source: PubMed Central journal article supplement (PMC8782876)

### Supplementary Figure 1: Risk of Bias Analysis Graph

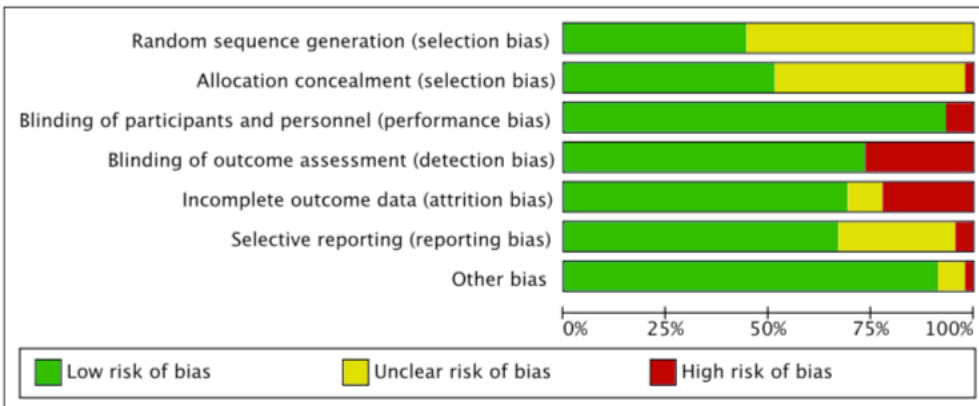

Risk of bias graph: review authors' judgements about each risk of bias item presented as percentages across all included studies.

## Supplementary Figure 2: Risk of Bias Analysis Summary

|                                         | Random sequence generation (selection bias) | Allocation concealment (selection bias) | Blinding of participants and personnel (performance bias) | Blinding of outcome assessment (detection bias) | Incomplete outcome data (attrition bias) | Selective reporting (reporting bias) | Other bias |
|-----------------------------------------|---------------------------------------------|-----------------------------------------|-----------------------------------------------------------|-------------------------------------------------|------------------------------------------|--------------------------------------|------------|
| Atmaca et al., 2002 (91.1 mg)           | ?                                           | ?                                       | ●                                                         | ●                                               | ●                                        | ●                                    | ?          |
| Bandelow et al., 2010 (150 mg)          | ●                                           | ●                                       | ●                                                         | ●                                               | ?                                        | ●                                    | ●          |
| Bandelow et al., 2010 (50 mg)           | ●                                           | ●                                       | ●                                                         | ●                                               | ?                                        | ●                                    | ●          |
| Barnett et al., 2002 (9 mg)             | ?                                           | ?                                       | ●                                                         | ●                                               | ●                                        | ?                                    | ●          |
| Bartzokis et al., 2004 (3 mg)           | ?                                           | ?                                       | ●                                                         | ●                                               | ●                                        | ?                                    | ●          |
| Black et al., 2014 (300 mg)             | ?                                           | ●                                       | ●                                                         | ●                                               | ●                                        | ●                                    | ●          |
| Black et al., 2014 (150 mg)             | ?                                           | ●                                       | ●                                                         | ●                                               | ●                                        | ●                                    | ●          |
| Bogenschutz and Nurnberg, 2004 (6.9 mg) | ?                                           | ?                                       | ●                                                         | ●                                               | ●                                        | ●                                    | ●          |
| Brawman-Mintzer et al., 2005 (1.1 mg)   | ?                                           | ●                                       | ●                                                         | ●                                               | ●                                        | ●                                    | ●          |
| Carey et al., 2012 (9.1 mg)             | ●                                           | ●                                       | ●                                                         | ●                                               | ●                                        | ?                                    | ●          |
| Denys et al., 2004 (175 mg)             | ?                                           | ?                                       | ●                                                         | ●                                               | ●                                        | ?                                    | ●          |
| Goddard et al., 2015 (150 mg - XR)      | ●                                           | ●                                       | ●                                                         | ●                                               | ●                                        | ●                                    | ●          |
| Guardia et al., 2004 (7.54 mg)          | ●                                           | ●                                       | ●                                                         | ●                                               | ●                                        | ●                                    | ●          |
| Hamilton et al., 2009 (6.8 mg)          | ?                                           | ●                                       | ●                                                         | ●                                               | ?                                        | ?                                    | ●          |
| Javdan et al., 2019 (100 mg)            | ●                                           | ●                                       | ●                                                         | ●                                               | ●                                        | ●                                    | ●          |
| Katzman et al., 2011 (162.8 mg - XR)    | ?                                           | ?                                       | ●                                                         | ●                                               | ●                                        | ●                                    | ●          |
| Khan et al., 2011 (150 mg)              | ●                                           | ?                                       | ●                                                         | ●                                               | ●                                        | ●                                    | ●          |
| Khan et al., 2011 (300mg)               | ●                                           | ?                                       | ●                                                         | ●                                               | ●                                        | ●                                    | ●          |
| Khan et al., 2011 (50 mg)               | ●                                           | ?                                       | ●                                                         | ●                                               | ●                                        | ●                                    | ●          |
| Khan et al., 2013 (300 mg - XR)         | ●                                           | ●                                       | ●                                                         | ●                                               | ●                                        | ●                                    | ●          |
| Krystal et al., 2011 (2.74 mg)          | ●                                           | ●                                       | ●                                                         | ●                                               | ●                                        | ●                                    | ●          |
| Linehan et al., 2007 (4.46 mg)          | ●                                           | ●                                       | ●                                                         | ●                                               | ●                                        | ?                                    | ●          |
| Loebel et al., 2008 (25 mg IM)          | ?                                           | ●                                       | ●                                                         | ●                                               | ●                                        | ●                                    | ●          |
| Lohoff et al., 2010 (50.24 mg)          | ?                                           | ●                                       | ●                                                         | ●                                               | ●                                        | ?                                    | ●          |
| Mariani et al., 2021 (200 mg)           | ●                                           | ●                                       | ●                                                         | ●                                               | ●                                        | ●                                    | ●          |
| McElroy et al., 2008 (8.9 mg)           | ?                                           | ●                                       | ●                                                         | ●                                               | ●                                        | ●                                    | ●          |
| Merideth et al., 2012 (150 mg - XR)     | ●                                           | ●                                       | ●                                                         | ●                                               | ●                                        | ?                                    | ●          |
| Merideth et al., 2012 (300 mg - XR)     | ●                                           | ●                                       | ●                                                         | ●                                               | ●                                        | ?                                    | ●          |
| Pandina et al., 2007 (1.07 mg)          | ●                                           | ●                                       | ●                                                         | ●                                               | ●                                        | ●                                    | ●          |
| Pollack et al., 2006 (8.7 mg)           | ?                                           | ?                                       | ●                                                         | ●                                               | ●                                        | ?                                    | ●          |
| Reich et al., 2004 (1.41 mg)            | ?                                           | ?                                       | ●                                                         | ●                                               | ●                                        | ●                                    | ●          |
| Sayyah et al., 2012 (10 mg)             | ?                                           | ●                                       | ●                                                         | ●                                               | ●                                        | ?                                    | ●          |
| Schulz et al., 2008 (7.09 mg)           | ●                                           | ?                                       | ●                                                         | ●                                               | ●                                        | ●                                    | ●          |
| Shapira et al., 2004 (6.1 mg)           | ?                                           | ?                                       | ●                                                         | ●                                               | ●                                        | ?                                    | ?          |
| Simon et al., 2008 (120.5 mg)           | ?                                           | ?                                       | ●                                                         | ●                                               | ●                                        | ●                                    | ●          |
| Soler et al., 2005 (8.83 mg)            | ?                                           | ?                                       | ●                                                         | ●                                               | ●                                        | ?                                    | ●          |
| Stein et al., 2002 (15 mg)              | ?                                           | ●                                       | ●                                                         | ●                                               | ●                                        | ●                                    | ?          |
| Storch et al., 2013 (4.94 mg)           | ●                                           | ●                                       | ●                                                         | ●                                               | ●                                        | ●                                    | ●          |
| Van Amerigen et al., 2010 (10.8 mg)     | ●                                           | ●                                       | ●                                                         | ●                                               | ●                                        | ●                                    | ●          |
| Vatsalya et al., 2016 (327.7 mg- XR)    | ?                                           | ?                                       | ●                                                         | ●                                               | ●                                        | ?                                    | ●          |
| Villarreal et al., 2016 (258 mg/d)      | ●                                           | ?                                       | ●                                                         | ●                                               | ●                                        | ●                                    | ●          |
| Vulink et al., 2009 (300 mg)            | ?                                           | ?                                       | ●                                                         | ●                                               | ●                                        | ●                                    | ●          |
| Zanarini et al., 2001 (5.33 mg)         | ?                                           | ?                                       | ●                                                         | ●                                               | ●                                        | ●                                    | ●          |
| Zanarini et al., 2010 (2.5mg)           | ?                                           | ?                                       | ●                                                         | ●                                               | ●                                        | ●                                    | ●          |
| Zanarini et al., 2010 (5-10 mg)         | ?                                           | ?                                       | ●                                                         | ●                                               | ●                                        | ●                                    | ●          |

### Supplementary Figure 3: Sub-group analysis according to previous AP exposure for change in weight with olanzapine

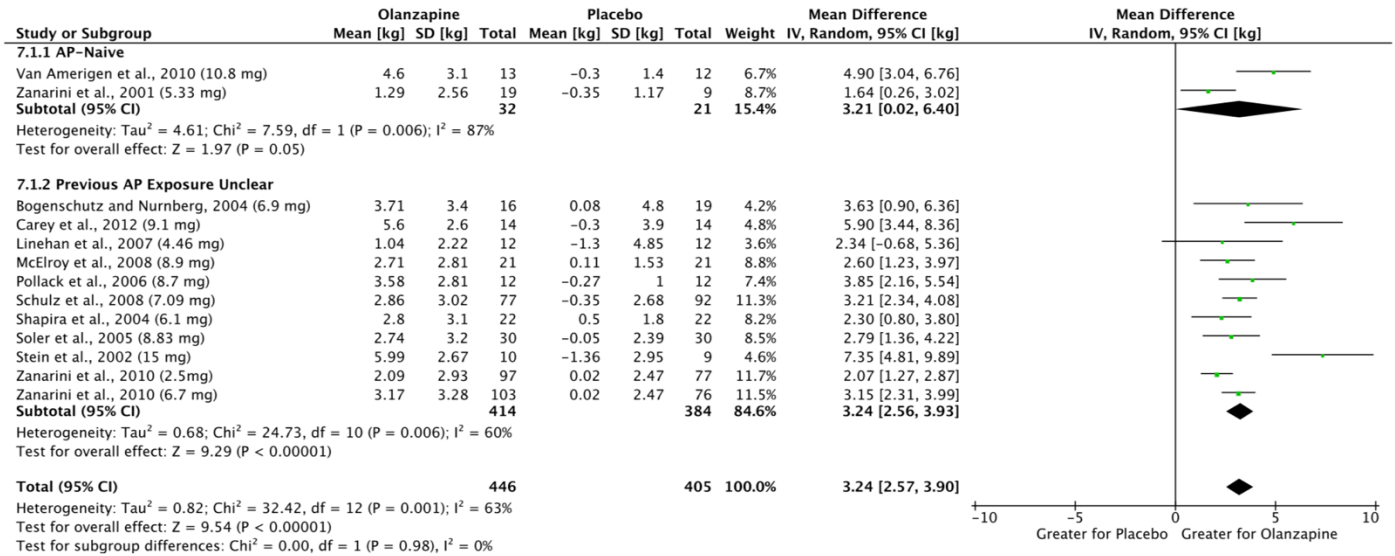

### Supplementary Figure 4: Sub-group analysis according to previous AP exposure for change in weight with risperidone

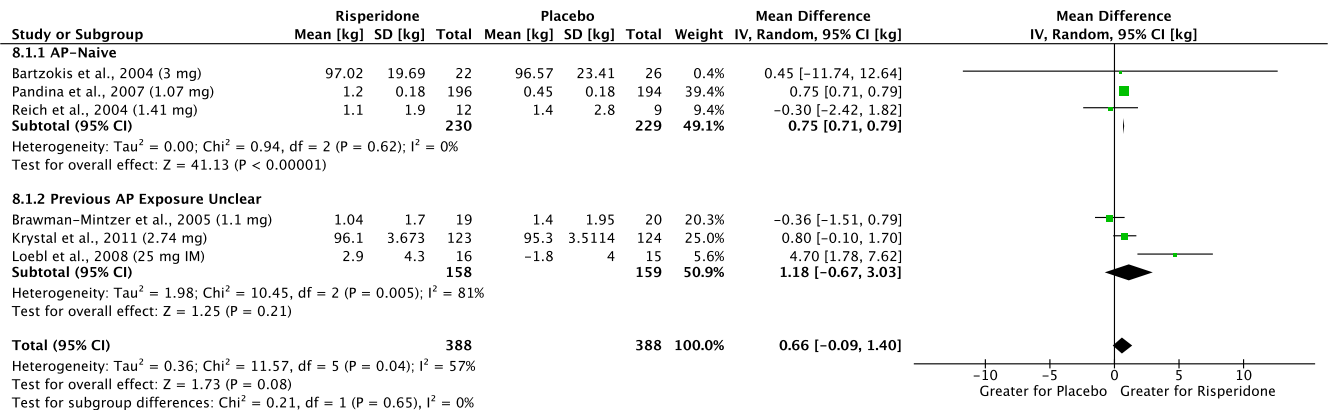

### Supplementary Figure 5: Sub-group analysis according to previous AP exposure for change in weight with quetiapine

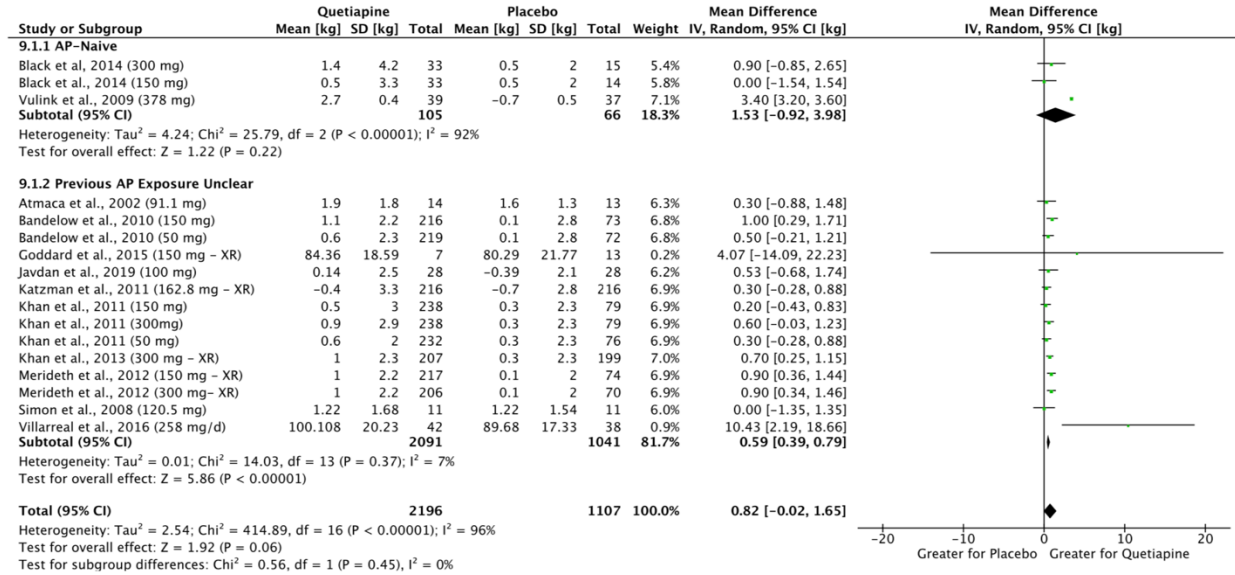

### Supplementary Figure 6: Funnel Plot for Olanzapine Comparison of Body Weight

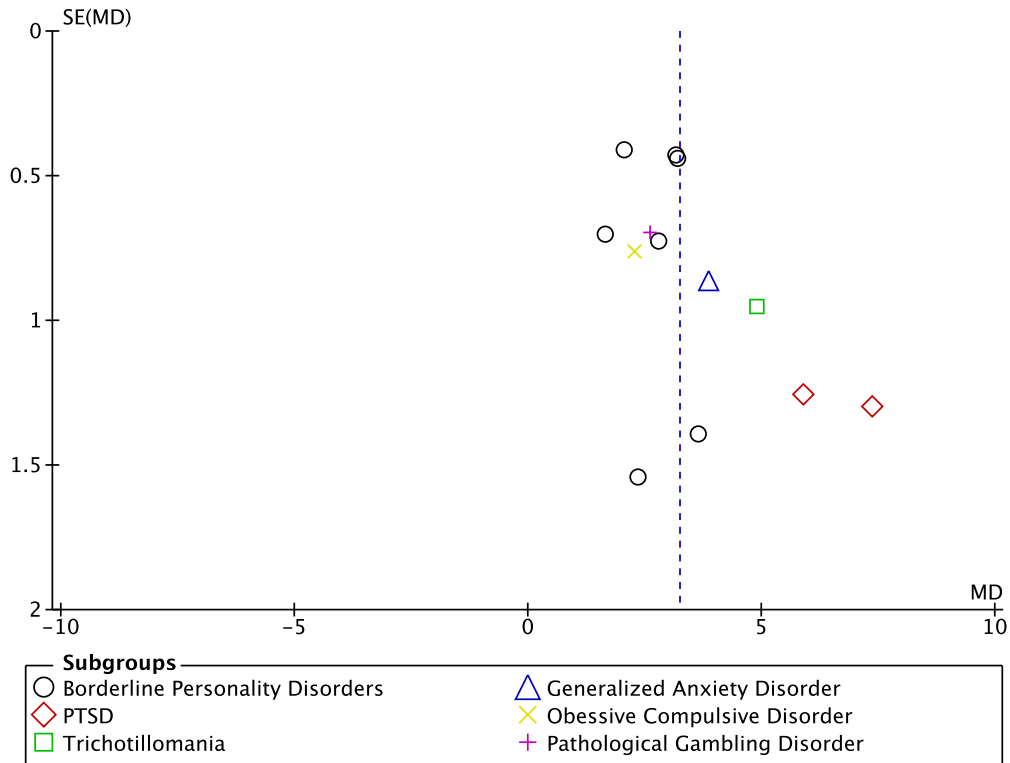

Supplementary Figure 7: Funnel Plot for Quetiapine Comparison of Body Weight

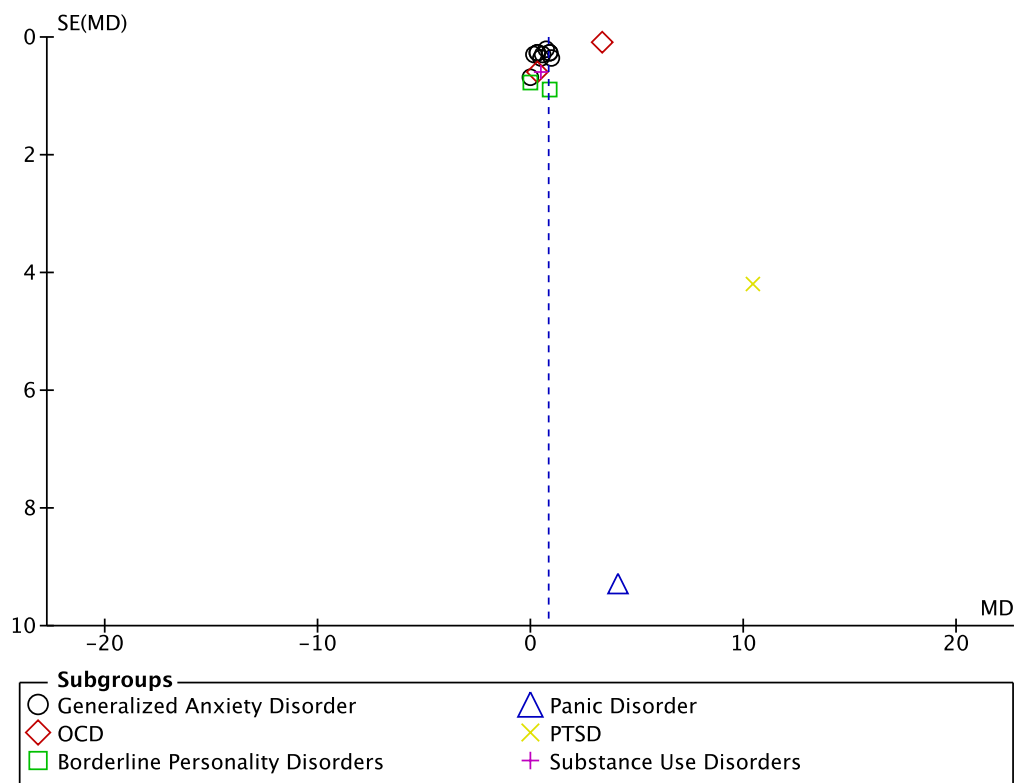

Supplement: 41386_2021_1163_MOESM1_ESM.pdf [file 41386_2021_1163_MOESM1_ESM.pdf]
