# Supplementary material
Source: PubMed Central journal article supplement (PMC8782876)
Supplement: 41386_2021_1163_MOESM4_ESM.pdf [file 41386_2021_1163_MOESM4_ESM.pdf]

August 14, 2021

To whom it may concern:

Re: Metabolic Adverse Effects of Off-Label Use of Second-Generation Antipsychotics in the Adult Population: A Systematic Review and Meta-Analysis  
NPP-21-0603R

This letter is to confirm that all authors are aware of the changes made to authorship order between revisions and agree with the final order that has been decided on. During the revision process, we were made aware that only two individuals could share first and last authorship. To comply with journal regulations, we had a group discussion to reach a consensus on an author order we would all be comfortable with.

Below are the signatures of all authors attesting to the final authorship order:

|                           |                                                                                     |
|---------------------------|-------------------------------------------------------------------------------------|
| Nicolette Stogios         |    |
| Emily Smith               |    |
| Sylvie Bowden             |    |
| Veronica Tran             |   |
| Roshanak Asgariroozbehani |  |
| William Brett McIntyre    |  |
| Gary Remington            |  |
| Dan Siskind               |  |
| Sri Mahavir Agarwal       |  |
| Margaret Hahn             |  |

Sincerely,

Margaret Hahn, MD, PhD, FRCPC  
Clinician-Scientist  
Centre for Addiction and Mental Health  
Associate Professor, University of Toronto, Department of Psychiatry  
250 College Street, Toronto, ON, M5T 1R8  
margaret.hahn@camh.ca
